# Supplementary material for: Oxford COVID-19 Vaccine Hesitancy in School Principals: Impacts of Gender, Well-Being, and Coronavirus-Related Health Literacy
Source: MDPI journal article supplement (doi:10.3390/vaccines9090985), 2021-09-03
Supplement: s1 [file s1]

**Table S1.** The distribution of study sample and total school principals by school locations and types ( $n = 387$ ).

| Study sample/total school<br>principal ratio |                                                | School location |          |         |        |                     | Subtotal | %    |
|----------------------------------------------|------------------------------------------------|-----------------|----------|---------|--------|---------------------|----------|------|
|                                              |                                                | North           | Center   | South   | East   | Outlying<br>islands |          |      |
| School type                                  | Primary school                                 | 71/794          | 74/820   | 53/763  | 29/191 | 16/63               | 243/2631 | 9.2  |
|                                              | Junior high school                             | 16/258          | 34/203   | 17/208  | 5/44   | 5/24                | 77/737   | 10.4 |
|                                              | Senior high school<br>and vocational<br>school | 25/212          | 16/132   | 9/141   | 4/23   | 4/5                 | 58/513   | 11.3 |
|                                              | School for special<br>children                 | 5/9             | 3/9      | 1/8     | 0/2    | 0/0                 | 9/28     | 32.1 |
|                                              | Subtotal                                       | 117/1273        | 127/1164 | 80/1120 | 38/260 | 25/92               | 387/3909 | 9.9  |
|                                              | %                                              | 9.2             | 10.9     | 7.1     | 14.6   | 27.2                | 9.9      |      |

**Table S2.** The distribution of school principals by different COVID-19 vaccine hesitancy items ( $n = 387$ ).

| Items                                                                                | Responses                                                                   | <i>n</i> | %    |
|--------------------------------------------------------------------------------------|-----------------------------------------------------------------------------|----------|------|
| 1. Would you take a COVID-19 vaccine if offered?                                     | <input type="checkbox"/> 1. Definitely                                      | 259      | 66.9 |
|                                                                                      | <input type="checkbox"/> 2. Probably                                        | 111      | 28.7 |
|                                                                                      | <input type="checkbox"/> 3. I may or I may not                              | 14       | 3.6  |
|                                                                                      | <input type="checkbox"/> 4. Probably not                                    | 1        | 0.3  |
|                                                                                      | <input type="checkbox"/> 5. Definitely not                                  | 2        | 0.5  |
|                                                                                      | <input type="checkbox"/> 6. Don't know                                      | 0        | 0.0  |
| 2. If there is a COVID-19 vaccine available                                          | <input type="checkbox"/> 1. I will want to get it as soon as possible       | 145      | 37.5 |
|                                                                                      | <input type="checkbox"/> 2. I will take it when offered                     | 233      | 60.2 |
|                                                                                      | <input type="checkbox"/> 3. I'm not sure what I will do                     | 6        | 1.6  |
|                                                                                      | <input type="checkbox"/> 4. I will put off (delay) getting it               | 3        | 0.8  |
|                                                                                      | <input type="checkbox"/> 5. I will refuse to get it                         | 0        | 0.0  |
|                                                                                      | <input type="checkbox"/> 6. Don't know                                      | 0        | 0.0  |
| 3. I would describe my attitude towards receiving a COVID-19 vaccine as:             | <input type="checkbox"/> 1. Very keen                                       | 78       | 20.2 |
|                                                                                      | <input type="checkbox"/> 2. Pretty positive                                 | 266      | 68.7 |
|                                                                                      | <input type="checkbox"/> 3. Neutral                                         | 42       | 10.9 |
|                                                                                      | <input type="checkbox"/> 4. Quite uneasy                                    | 0        | 0.0  |
|                                                                                      | <input type="checkbox"/> 5. Against it                                      | 0        | 0.0  |
|                                                                                      | <input type="checkbox"/> 6. Don't know                                      | 1        | 0.3  |
| 4. If a COVID-19 vaccine was available at my local pharmacy, I would:                | <input type="checkbox"/> 1. Get it as soon as possible                      | 262      | 67.7 |
|                                                                                      | <input type="checkbox"/> 2. Get it when I have time                         | 116      | 30.0 |
|                                                                                      | <input type="checkbox"/> 3. Delay getting it                                | 8        | 2.1  |
|                                                                                      | <input type="checkbox"/> 4. Avoid getting it for as long as possible        | 0        | 0.0  |
|                                                                                      | <input type="checkbox"/> 5. Never get it                                    | 0        | 0.0  |
|                                                                                      | <input type="checkbox"/> 6. Don't know                                      | 1        | 0.3  |
| 5. If my family or friends were thinking of getting a COVID-19 vaccination, I would: | <input type="checkbox"/> 1. Strongly encourage them                         | 131      | 33.9 |
|                                                                                      | <input type="checkbox"/> 2. Encourage them                                  | 223      | 57.6 |
|                                                                                      | <input type="checkbox"/> 3. Not say anything to them about it               | 28       | 7.2  |
|                                                                                      | <input type="checkbox"/> 4. Ask them to delay getting the vaccination       | 3        | 0.8  |
|                                                                                      | <input type="checkbox"/> 5. Suggest that they do not get the vaccination    | 0        | 0.0  |
|                                                                                      | <input type="checkbox"/> 6. Don't know                                      | 2        | 0.5  |
| 6. I would describe myself as:                                                       | <input type="checkbox"/> 1. Eager to get a COVID-19 vaccine                 | 94       | 24.3 |
|                                                                                      | <input type="checkbox"/> 2. Willing to get the COVID-19 vaccine             | 283      | 73.1 |
|                                                                                      | <input type="checkbox"/> 3. Not bothered about getting the COVID-19 vaccine | 9        | 2.3  |
|                                                                                      | <input type="checkbox"/> 4. Unwilling to get the COVID-19 vaccine           | 0        | 0.0  |
|                                                                                      | <input type="checkbox"/> 5. Anti-vaccination for COVID-19                   | 0        | 0.0  |
|                                                                                      | <input type="checkbox"/> 6. Don't know                                      | 1        | 0.3  |
| 7. Taking a COVID-19 vaccination is:                                                 | <input type="checkbox"/> 1. Really important                                | 230      | 59.4 |
|                                                                                      | <input type="checkbox"/> 2. Important                                       | 148      | 38.2 |
|                                                                                      | <input type="checkbox"/> 3. Neither important nor unimportant               | 8        | 2.1  |
|                                                                                      | <input type="checkbox"/> 4. Unimportant                                     | 0        | 0.0  |
|                                                                                      | <input type="checkbox"/> 5. Really unimportant                              | 0        | 0.0  |
|                                                                                      | <input type="checkbox"/> 6. Don't know                                      | 1        | 0.3  |
